# Supplementary material for: scMEGA: single-cell multi-omic enhancer-based gene regulatory network inference
Source: Bioinform Adv. 2023 Jan 12;3(1):vbad003. doi: 10.1093/bioadv/vbad003 (PMC9853317; doi:10.1093/bioadv/vbad003)
Supplement: vbad003_Supplementary_Data [file vbad003_supplementary_data.pdf]

# scMEGA: Single-cell Multiomic Enhancer-based Gene Regulatory Network Inference

Zhijian Li<sup>1</sup>, James S Nagai<sup>1</sup>, Christoph Kuppe<sup>2,3</sup>, Rafael Kramann<sup>2,3,4</sup>, and Ivan G. Costa<sup>1, \*</sup>

<sup>1</sup>Institute for Computational Genomics, Joint Research Center for Computational Biomedicine, RWTH Aachen University Medical School, 52074 Aachen, Germany

<sup>2</sup>Institute of Experimental Medicine and Systems Biology, RWTH Aachen University, Aachen 52062, Germany

<sup>3</sup>Division of Nephrology and Clinical Immunology, RWTH Aachen University, Aachen 52062, Germany

<sup>4</sup>Department of Internal Medicine, Nephrology and Transplantation, Erasmus Medical Center, Rotterdam, The Netherlands

\*corresponding authors: [ivan.costa@rwth-aachen.de](mailto:ivan.costa@rwth-aachen.de)

January 10, 2023

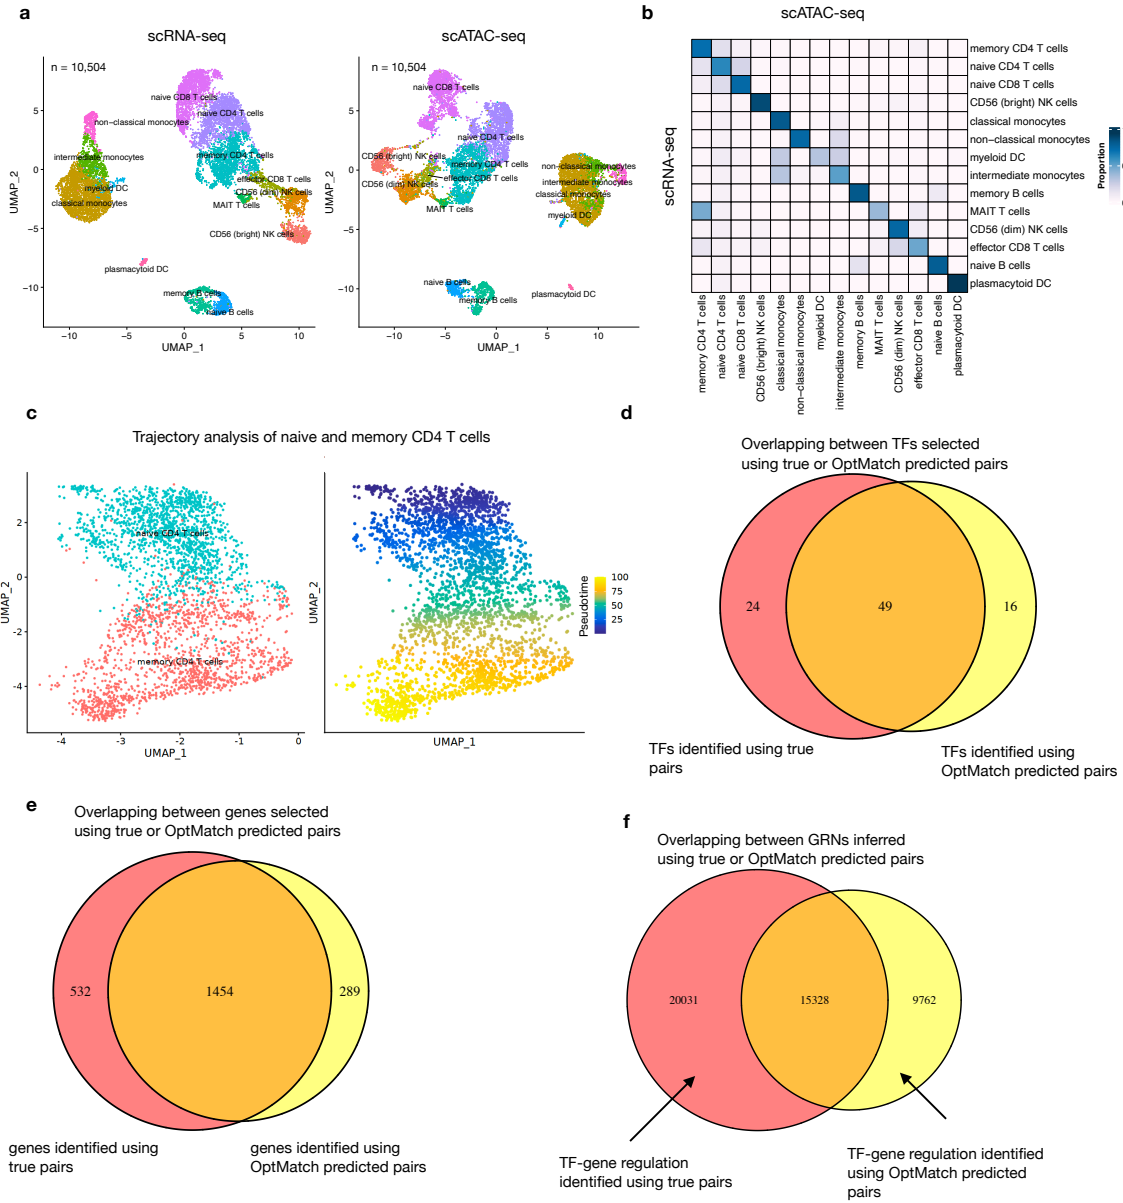

**Supplementary Fig. 1. Benchmarking of the robustness of scMEGA using single-cell multimodal PBMC cells.** **a**, UMAP embedding of scRNA-seq (left) and scATAC-seq (right) of PBMC cells. Labels refer to annotated cell types. The number of cells is shown in the left-upper corner. **b**, Confusion matrix showing evaluation results of OptMatch prediction. Colors refer to the proportion of predicted pairs that are from the same cell types. **c**, Trajectory analysis from naive CD4 T cells to memory CD4 T cells characterizing T cells activation. Colors refer to different cell types (left) or pseudotime (right). **d**, Venn diagram showing the overlapping of TFs selected by scMEGA using true or OptMatch predicted pairs between scRNA-seq and scATAC-seq cells. **e**, Same as **d** for selected genes. **f**, Same as **d** for inferred TF-gene regulations.

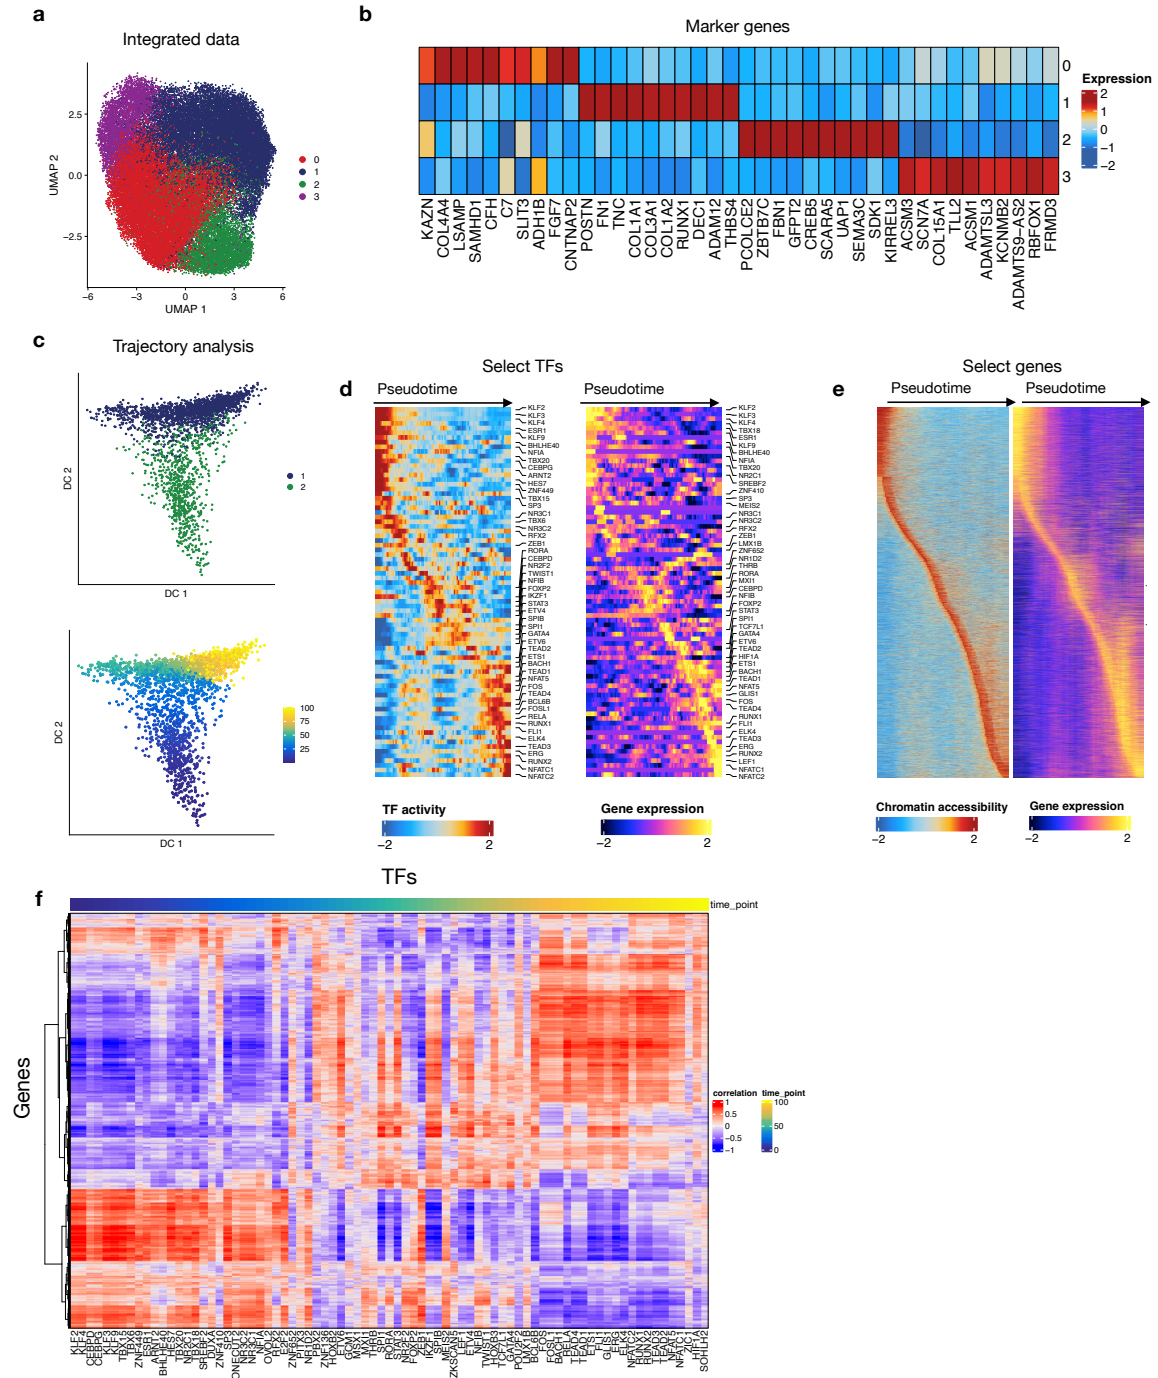

**Supplementary Fig. 2. Sub-clustering of integrated snRNA-seq and snATAC-seq for fibroblasts.** **a**, UMAP embedding of the integrated data colored by sub-clusters of fibroblasts. **b**, Heatmap showing the expression of the top 10 markers for each cluster after z-score transformation. **c**, Diffusion map showing the differentiation trajectory from the cluster 2 (*SCARA5*+) to the cluster 1 (*POSTN*+) as colored by clusters (upper) and pseudotime points (lower). **d**, Heat maps showing the selected TFs based on the correlation of binding activity and expression along the pseudotime trajectory. **e**, Heat maps showing the selected genes based on the correlation of peak accessibility and gene expression along the pseudotime trajectory. **f**, Heat map of the correlation between the binding activity of the selected TFs and expression of the selected genes.

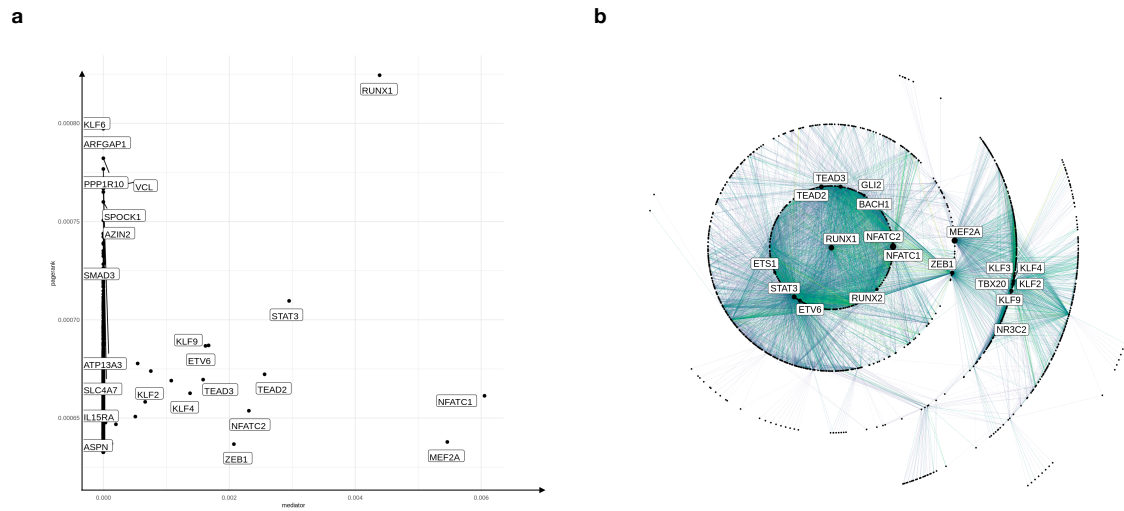

**Supplementary Fig. 3. Network analysis identifies important regulators** **a**, Scatter plot showing the topological network measures embedding. The x-axis represents betweenness and the y-axis represents the PageRank scores of regulators. RUNX1 is the only factor, which has high values for both measures. **b**, Runx1-centric layout embedding of the network. It indicates Runx1 has several target genes including other TFs such as Tead3, Tead2 and Bach1.
